# Supplementary material for: Molecular Characterization of Carbapenem Resistant Klebsiella pneumoniae and Klebsiella quasipneumoniae Isolated from Lebanon
Source: PubMed Central journal article supplement (PMC6345840; doi:10.1038/s41598-018-36554-2), 2019-01-24
Supplement: 41598_2018_36554_MOESM1_ESM.pdf [file 41598_2018_36554_MOESM1_ESM.pdf]

**Molecular Characterization of Carbapenem Resistant *Klebsiella pneumoniae* and *Klebsiella quasipneumoniae* Isolated from Lebanon**

Harout Arabaghian<sup>1</sup>, Tamara Salloum<sup>1</sup>, Sahar Alousi<sup>1</sup>, Balig Panossian<sup>1</sup>, George F. Araj<sup>2</sup> & Sima Tokajian<sup>1,\*</sup>

<sup>1</sup>Department of Natural Sciences, School of Arts and Sciences, Lebanese American University, Byblos, 1401, Lebanon

<sup>2</sup>Department of Pathology and Laboratory Medicine, Faculty of Medicine, American University of Beirut Medical Center, Beirut, 1107, Lebanon

\*Address for correspondence: Dr. Sima Tokajian, Department of Natural Sciences, School of Arts and Sciences, Lebanese American University, Byblos, 1401, Lebanon; Tel: +961-9-547254  
Email: [stokajian@lau.edu.lb](mailto:stokajian@lau.edu.lb)

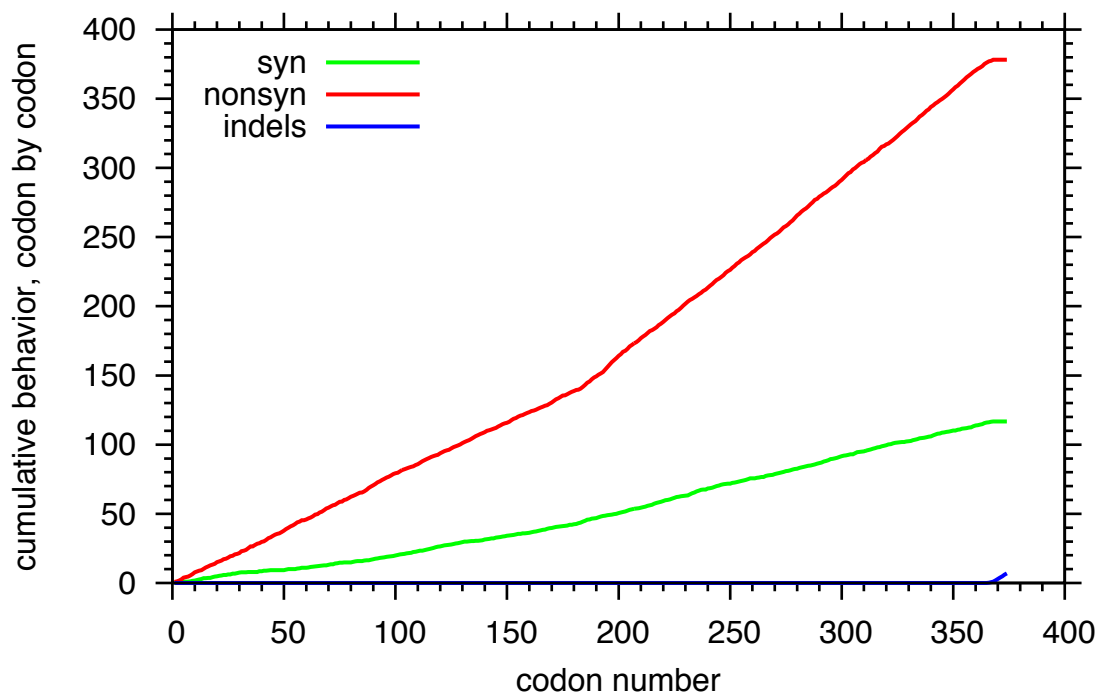

Supplementary Figure S1. OmpK36 cumulative dS/dN graph showing prevalence of cumulative synonymous and non-synonymous substitutions along the OmpK36 codon sequence.  $dS = 1.1621$   $dN = 1.4630$   $dN/dS = 1.2589$

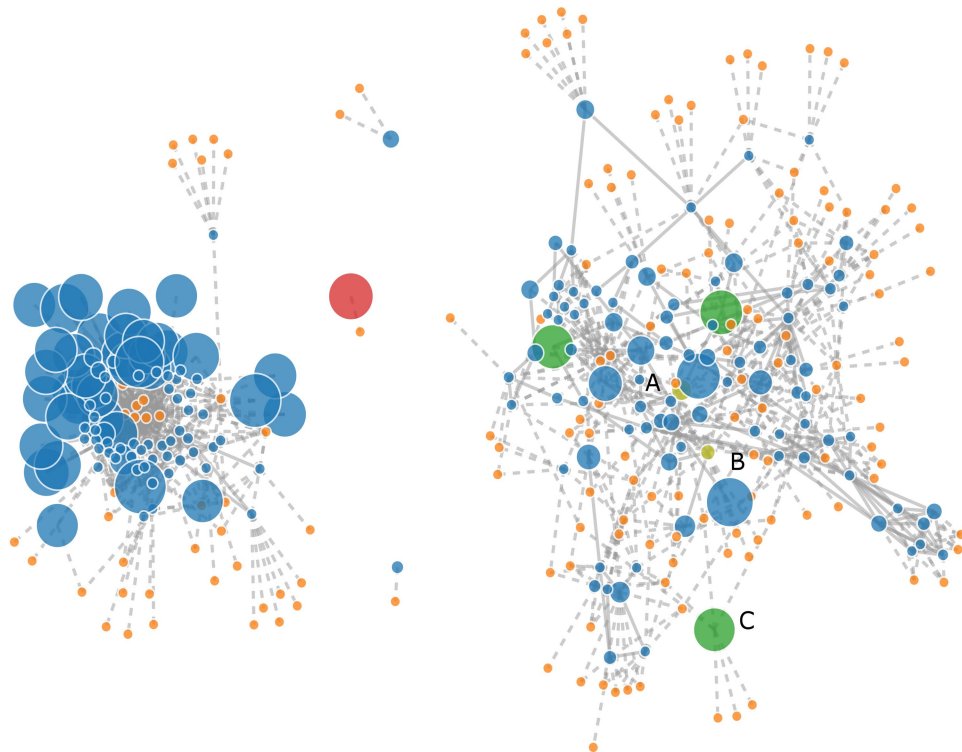

Supplementary Figure S2. Schematic representation of the KP1 genome using PLACNETw. KP1 contains a single multi-replicon plasmid (containing three replicons A, B, and C) and three smaller plasmids. A: IncFIA, B: IncR, C: IncFIK, green circles: relaxase and replication initiator; red circle: relaxase; yellow circles: replication initiator; blue circles: contigs.

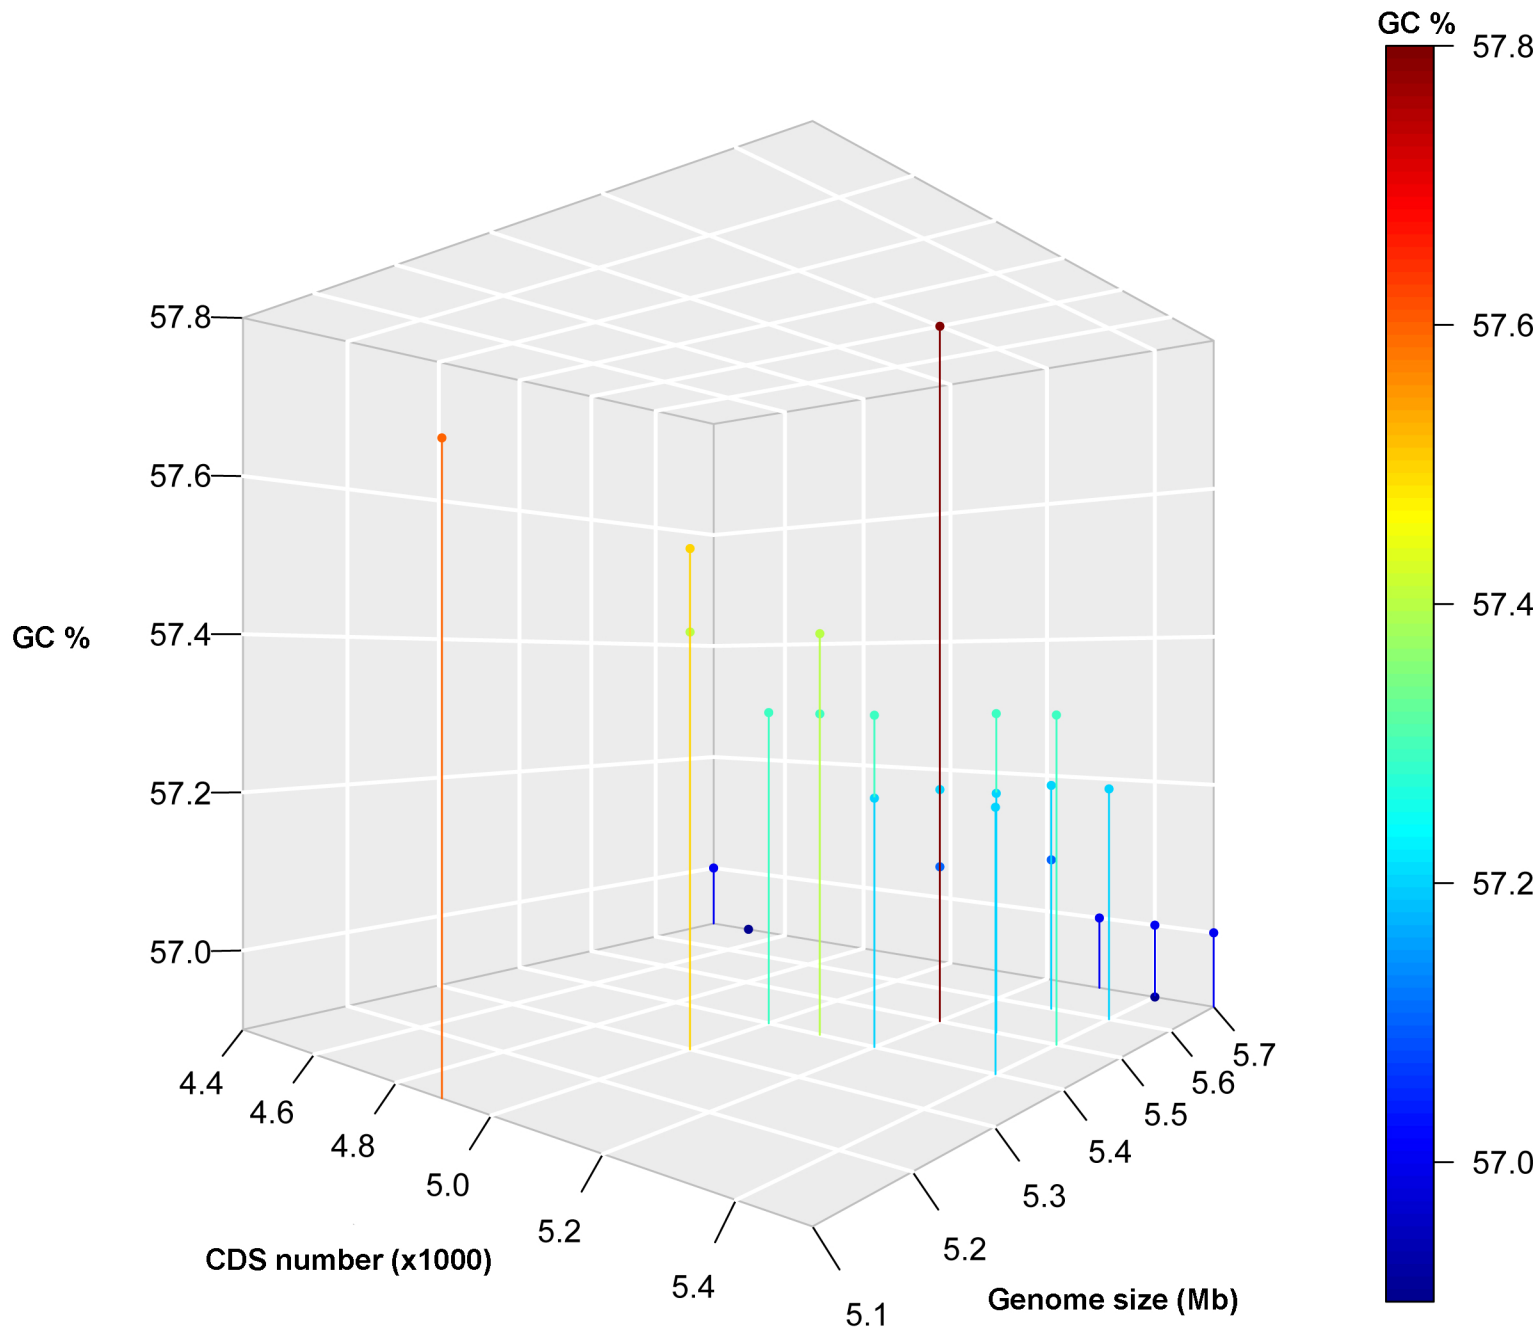

Supplementary Figure S3. Three-dimensional plots of genome size, coding sequence number and GC content of the 34 isolates; CDSs: number of coding sequences.

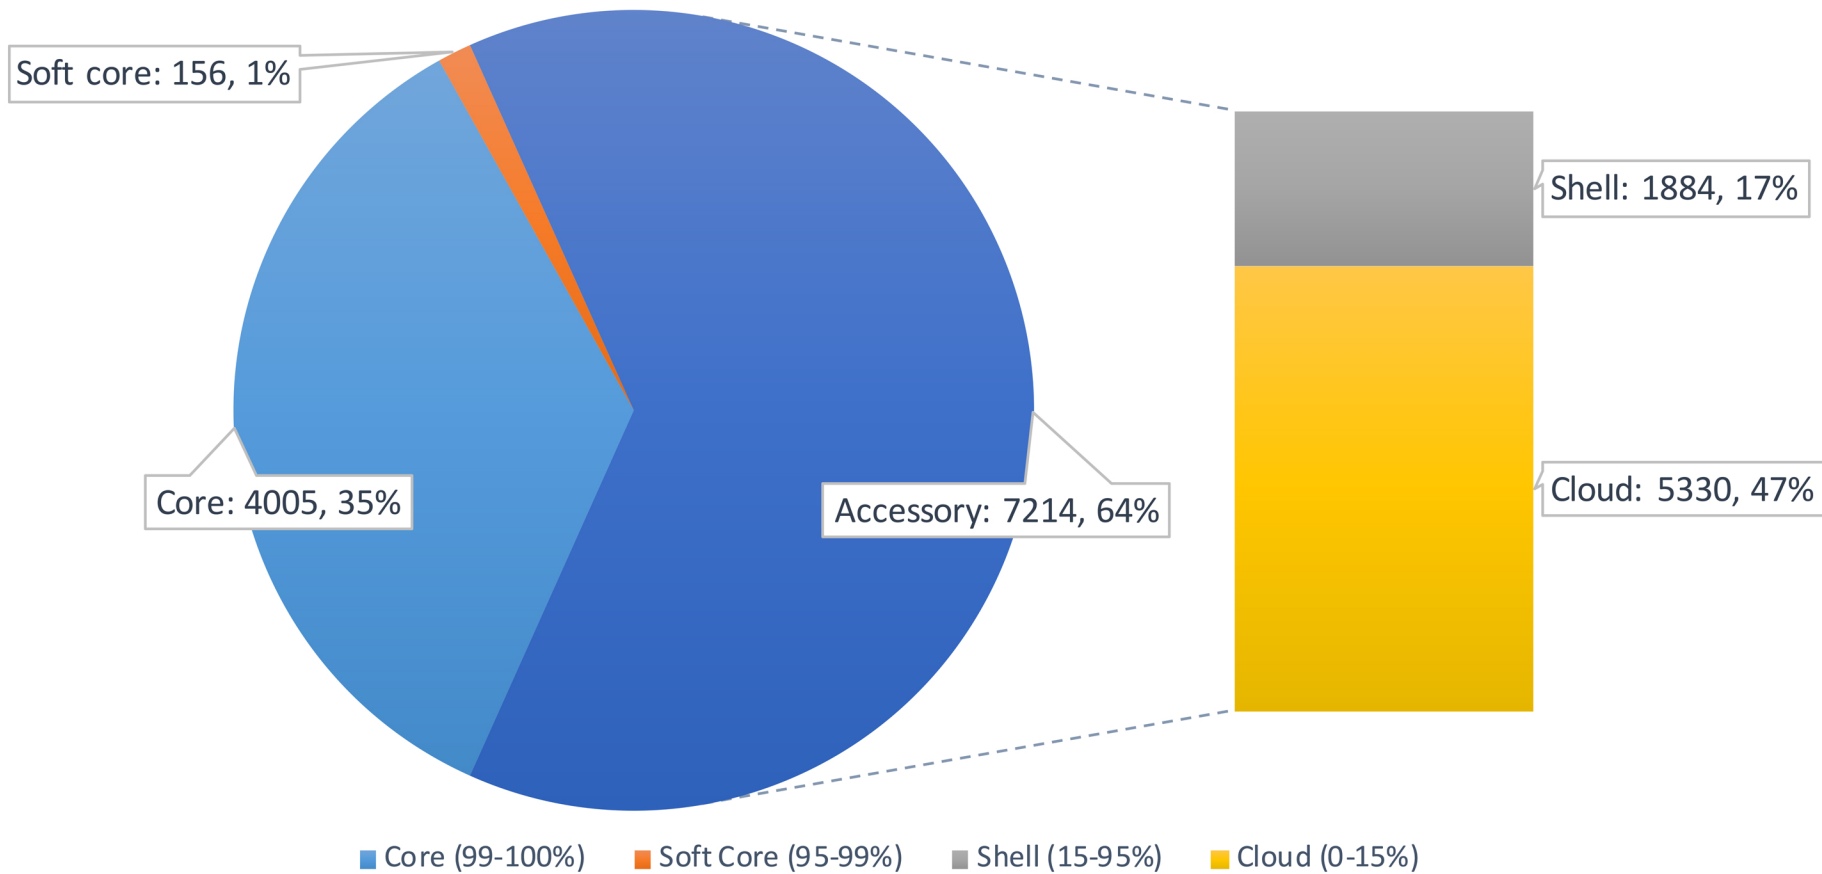

Supplementary Figure S4. Gene distribution in *K. pneumoniae* pan-genome.



Supplementary Table S1b. Antimicrobial susceptibility testing results for the tested antibiotics against all of the isolates.

| Isolate | Fluoroquinolones |              |             | Nitrofurans | Tetracycline | Folate pathway inhibitors | Carbapenems |                |              | Phosphonic acids | Polymyxins | Glycyclines |              |
|---------|------------------|--------------|-------------|-------------|--------------|---------------------------|-------------|----------------|--------------|------------------|------------|-------------|--------------|
|         | Ciprofloxacin    | Levofloxacin | Norfloxacin |             |              |                           | Ofloxacin   | Nitrofurantoin | Tetracycline |                  |            |             | Trimethoprim |
| KP1     | R                | R            | R           | R           | R            | R                         | R           | R              | R            | R                | S          | S           | I            |
| KP2     | R                | R            | R           | R           | R            | R                         | R           | R              | S            | S                | I          | S           | I            |
| KP3     | R                | R            | R           | R           | R            | R                         | R           | R              | I            | I                | S          | S           | S            |
| KP4     | S                | S            | S           | R           | S            | S                         | S           | R              | I            | I                | S          | S           | S            |
| KP5     | I                | I            | S           | R           | I            | S                         | S           | R              | I            | I                | S          | I           | S            |
| KP6     | S                | S            | R           | R           | R            | S                         | S           | I              | I            | I                | S          | I           | S            |
| KP7     | R                | R            | R           | R           | R            | R                         | R           | R              | S            | I                | R          | S           | S            |
| KP8     | R                | R            | R           | R           | I            | R                         | R           | R              | S            | S                | S          | S           | S            |
| KP9     | S                | S            | S           | S           | S            | S                         | S           | R              | I            | S                | R          | S           | S            |
| KP10    | I                | I            | I           | I           | S            | R                         | R           | I              | I            | S                | S          | S           | S            |
| KP11    | S                | S            | S           | S           | S            | R                         | R           | R              | I            | S                | S          | S           | I            |
| KP12    | R                | R            | R           | R           | S            | R                         | R           | R              | S            | S                | S          | S           | S            |
| KP13    | R                | R            | R           | R           | S            | R                         | R           | R              | R            | I                | S          | S           | S            |
| KP14    | S                | S            | S           | R           | R            | S                         | S           | R              | R            | R                | S          | S           | S            |
| KP15    | S                | S            | S           | R           | R            | S                         | S           | R              | R            | R                | R          | I           | I            |
| KP16    | R                | R            | R           | R           | R            | R                         | R           | R              | R            | R                | S          | I           | S            |
| KP17    | S                | S            | S           | R           | R            | S                         | R           | R              | R            | R                | S          | I           | S            |
| KP18    | R                | R            | R           | R           | R            | R                         | R           | R              | R            | R                | S          | I           | S            |
| KP19    | S                | S            | S           | I           | S            | S                         | S           | R              | R            | R                | S          | S           | S            |
| KP20    | R                | R            | S           | R           | R            | R                         | R           | R              | R            | S                | S          | S           | S            |
| KP21    | I                | I            | S           | R           | R            | R                         | R           | I              | S            | S                | S          | S           | S            |
| KP22    | S                | S            | S           | R           | R            | S                         | S           | R              | R            | R                | S          | S           | S            |
| KP23    | S                | S            | S           | S           | S            | S                         | S           | R              | R            | I                | S          | S           | S            |
| KP24    | S                | S            | S           | S           | S            | S                         | S           | R              | R            | I                | S          | I           | S            |
| KP25    | S                | S            | S           | S           | S            | S                         | R           | I              | R            | S                | S          | S           | S            |
| KP26    | S                | S            | S           | R           | R            | S                         | S           | R              | R            | I                | S          | S           | S            |
| KP27    | R                | R            | R           | R           | R            | R                         | R           | R              | R            | I                | S          | I           | R            |
| KP28    | R                | R            | R           | R           | R            | R                         | R           | R              | R            | R                | S          | I           | I            |
| KP29    | I                | S            | S           | S           | S            | S                         | R           | R              | R            | R                | S          | I           | S            |
| KP30    | R                | R            | R           | R           | R            | R                         | R           | R              | R            | S                | S          | I           | I            |
| KP31    | S                | S            | S           | R           | R            | S                         | S           | R              | R            | I                | S          | S           | S            |
| KP32    | R                | R            | R           | R           | R            | R                         | R           | R              | S            | I                | S          | S           | R            |
| KQ1     | S                | S            | S           | S           | R            | S                         | S           | I              | I            | I                | S          | S           | S            |
| KQ2     | S                | S            | S           | S           | R            | S                         | S           | R              | R            | I                | S          | S           | S            |

**Supplementary Table S2. Isolate information including source of specimen, sex and age of patients, year of isolation, MDR or XDR status and NCBI accession numbers.**

| Isolate | Source             | Sex | Age | Year | MDR or XDR status | Accession #  |
|---------|--------------------|-----|-----|------|-------------------|--------------|
| KP1     | DTA                | M   | 75  | 2012 | XDR               | NIBY00000000 |
| KP2     | C Section Wound    | F   | 38  | 2012 | XDR               | NIBZ00000000 |
| KP3     | Urine              | F   | 18  | 2013 | MDR               | NICA00000000 |
| KP4     | Urine              | F   | 87  | 2013 | MDR               | NICB00000000 |
| KP5     | DTA                | M   | 67  | 2013 | MDR               | NICC00000000 |
| KP6     | Cyst               | M   | 20  | 2013 | MDR               | NICD00000000 |
| KP7     | Drain Site         | F   | 83  | 2013 | XDR               | NICE00000000 |
| KP8     | Drain Site         | F   | 83  | 2013 | MDR               | NICF00000000 |
| KP9     | Urine              | F   | 63  | 2013 | MDR               | NICG00000000 |
| KP10    | Urine              | F   | 71  | 2013 | MDR               | NICH00000000 |
| KP11    | Lung Swab          | M   | 69  | 2013 | MDR               | NICI00000000 |
| KP12    | DTA                | F   | 79  | 2013 | MDR               | NIFL00000000 |
| KP13    | DTA                | F   | 79  | 2013 | MDR               | NIFM00000000 |
| KP14    | Urine              | M   | 72  | 2013 | MDR               | NICJ00000000 |
| KP15    | Urine              | M   | 73  | 2013 | MDR               | NICK00000000 |
| KP16    | Unknown            | F   | 82  | 2013 | XDR               | NICL00000000 |
| KP17    | Urine              | F   | 33  | 2013 | MDR               | NICM00000000 |
| KP18    | DTA                | M   | 59  | 2013 | MDR               | NICN00000000 |
| KP19    | Urine              | M   | 68  | 2013 | MDR               | NICO00000000 |
| KP20    | Leg Tissue         | M   | 22  | 2013 | MDR               | NICP00000000 |
| KP21    | Incision Site Swab | M   | 32  | 2014 | MDR               | NICQ00000000 |
| KP22    | Skin               | F   | 50  | 2014 | MDR               | NICR00000000 |
| KP23    | Skin               | M   | 64  | 2014 | MDR               | NICU00000000 |
| KP24    | Peripheral         | M   | 54  | 2015 | MDR               | NICV00000000 |
| KP25    | Urine              | F   | 33  | 2015 | MDR               | NICW00000000 |
| KP26    | Wound              | F   | 74  | 2015 | MDR               | NICX00000000 |
| KP27    | Urine              | M   | 30  | 2015 | XDR               | NICY00000000 |
| KP28    | Urine              | M   | 74  | 2015 | XDR               | NICZ00000000 |
| KP29    | Skin               | M   | 59  | 2015 | MDR               | NWBX00000000 |
| KP30    | Urine              | F   | 57  | 2013 | XDR               | NWBY00000000 |
| KP31    | Skin               | M   | 62  | 2015 | MDR               | NWBZ00000000 |
| KP32    | Urine              | M   | 30  | 2015 | XDR               | NWCA00000000 |
| KQ1     | Isolate            | F   | 36  | 2014 | MDR               | NICS00000000 |
| KQ2     | Pus                | F   | 79  | 2014 | MDR               | NICT00000000 |





**Supplementary Table S4. Description of ICEKp variants detected among the isolates.**

| <b>ICEKp</b> | <b>Isolate</b>                      | <b>YbST lineages from Lam et al (2018)</b> | <b>Length (kbp)</b> | <b>Unique genes in variable regions from Lam et al (2018)</b>                                                                                      | <b>Accession number</b> |
|--------------|-------------------------------------|--------------------------------------------|---------------------|----------------------------------------------------------------------------------------------------------------------------------------------------|-------------------------|
| ICEKp3       | KP17, KP20                          | 8, 9                                       | 65                  | Restriction endonuclease, DUF4917 domain containing protein, ATP/GTP phosphatase, Reverse transcriptase, DDE endonuclease, 5 Hypothetical proteins | KY454628                |
| ICEKp4       | KP1-3, KP11-13, KP25, KP28-31, KP34 | 10                                         | 58                  | Transposase, ABC transporter, Type I restriction endonuclease, DNA methyltransferase, Hypothetical protein                                         | KY454629                |
| ICEKp5       | KP10                                | 6, 14                                      | 66                  | DEAD/DEAH box helicase, Thiamine biosynthesis protein ThiF, 2 Patatin-like phospholipases, 6 Hypothetical proteins                                 | KY454630                |
| ICEKp12      | KP19                                | 9, 10, 14, 16                              | 97                  | Exonuclease SbcC, DNA helicase UvrD, ATP-dependent endonuclease, 5 Hypothetical proteins                                                           | KY454636                |

**Supplementary Table S5. Genome statistics.** The number of subsystems was inferred by RAST annotation tool; CDSs: coding sequences; STDEV: standard deviation.

| #  | Sample | Coverage | Size       | GC %  | N50       | L50        | Contigs    | Subsystems | CDSs   | RNAs   |
|----|--------|----------|------------|-------|-----------|------------|------------|------------|--------|--------|
| 1  | KP1    | 30x      | 5,701,879  | 57    | 383386    | 6          | 90         | 595        | 5426   | 110    |
| 2  | KP2    | 30x      | 5,538,655  | 57.3  | 365966    | 5          | 92         | 598        | 5299   | 110    |
| 3  | KP3    | 30x      | 5,483,149  | 57.2  | 298205    | 7          | 83         | 592        | 5184   | 112    |
| 4  | KP4    | 30x      | 5,345,213  | 57.4  | 393139    | 6          | 80         | 590        | 5057   | 125    |
| 5  | KP5    | 30x      | 5,624,416  | 57.1  | 350416    | 5          | 113        | 595        | 5332   | 121    |
| 6  | KP6    | 30x      | 5,617,544  | 57.1  | 356543    | 5          | 88         | 595        | 5334   | 120    |
| 7  | KP7    | 30x      | 5,418,820  | 57.2  | 377281    | 5          | 73         | 596        | 5213   | 115    |
| 8  | KP8    | 30x      | 5,400,670  | 57.3  | 379465    | 4          | 69         | 596        | 5194   | 115    |
| 9  | KP9    | 30x      | 5,500,715  | 57.2  | 305666    | 6          | 68         | 598        | 5216   | 106    |
| 10 | KP10   | 30x      | 5,704,986  | 57    | 341307    | 5          | 114        | 599        | 5478   | 111    |
| 11 | KP11   | 30x      | 5,552,392  | 57.2  | 319350    | 6          | 98         | 592        | 5336   | 112    |
| 12 | KP12   | 30x      | 5,732,024  | 56.9  | 294939    | 8          | 100        | 598        | 4550   | 106    |
| 13 | KP13   | 30x      | 5,674,785  | 57    | 294939    | 8          | 95         | 596        | 5371   | 106    |
| 14 | KP14   | 30x      | 5,178,076  | 57.6  | 420528    | 4          | 84         | 586        | 4920   | 119    |
| 15 | KP15   | 30x      | 5,409,266  | 57.2  | 350623    | 6          | 78         | 589        | 5156   | 112    |
| 16 | KP16   | 30x      | 5,545,493  | 57    | 419,656   | 6          | 80         | 594        | 5,313  | 114    |
| 17 | KP17   | 30x      | 5,428,356  | 57.4  | 351,158   | 6          | 94         | 594        | 5,116  | 118    |
| 18 | KP18   | 30x      | 5,547,879  | 57.3  | 328,662   | 6          | 118        | 598        | 5,361  | 105    |
| 19 | KP19   | 30x      | 5,442,987  | 57.2  | 328,518   | 7          | 97         | 587        | 5,172  | 120    |
| 20 | KP20   | 30x      | 5,359,526  | 57.3  | 438631    | 3          | 48         | 588        | 5,072  | 102    |
| 21 | KP21   | 30x      | 5,508,229  | 57.1  | 315,823   | 5          | 116        | 588        | 5,184  | 110    |
| 22 | KP22   | 30x      | 5,726,784  | 57    | 355,645   | 6          | 135        | 598        | 5,468  | 100    |
| 23 | KP23   | 30x      | 5,396,502  | 57.4  | 759,858   | 3          | 83         | 590        | 5,121  | 119    |
| 24 | KP24   | 30x      | 5,389,400  | 57.3  | 364,756   | 6          | 82         | 589        | 5,094  | 104    |
| 25 | KP25   | 30x      | 5,412,803  | 57.4  | 482,897   | 4          | 91         | 592        | 5,147  | 121    |
| 26 | KP26   | 30x      | 5,568,664  | 57.2  | 369,998   | 5          | 88         | 598        | 5,274  | 129    |
| 27 | KP27   | 30x      | 5,655,394  | 57    | 294,938   | 8          | 94         | 596        | 5,336  | 114    |
| 28 | KP28   | 30x      | 5,600,423  | 57.2  | 425,815   | 3          | 102        | 598        | 5,382  | 113    |
| 29 | KP29   | 30x      | 5,612,182  | 57.2  | 289,762   | 7          | 100        | 599        | 5,340  | 107    |
| 30 | KP30   | 30x      | 5,279,237  | 57.5  | 354,225   | 5          | 84         | 587        | 4991   | 115    |
| 31 | KP31   | 30x      | 5,680,583  | 56.9  | 255933    | 9          | 115        | 596        | 5385   | 114    |
| 32 | KP32   | 30x      | 5,525,132  | 57.2  | 259,569   | 6          | 108        | 595        | 5,280  | 131    |
| 33 | KQ1    | 30x      | 5,495,455  | 57.8  | 473,825   | 4          | 93         | 595        | 5,207  | 110    |
| 34 | KQ2    | 30x      | 5,490,427  | 57.8  | 473,824   | 4          | 83         | 595        | 5,190  | 111    |
|    |        | Average  | 5,516,119  | 57    | 369,860   | 6          | 92         | 594        | 5,221  | 113    |
|    |        | STDEV    | 134003.036 | 0.216 | 90349.921 | 1.48101473 | 16.9760238 | 3.95248066 | 178.15 | 7.2203 |

Supplementary Table S6. Phage content in the 34 isolates. In total, 43 different phages were identified. The number of detected phages ranged from 1 in KP14 and KP29 to 11 phages in KP18. Salmonella phage RE-2010 (accession no. NC\_019488) was the most commonly identified in 38.2% (n=13) of the isolates.

|      | # | Region  | Completeness | # of Proteins | Position        | Phage                                 | GC %   | Accession #               |
|------|---|---------|--------------|---------------|-----------------|---------------------------------------|--------|---------------------------|
| KP1  | 1 | 55.2Kb  | intact       | 49            | 914751-970036   | Enterobacteria phage mEp237           | 51.34% | <a href="#">NC_019704</a> |
|      | 2 | 47Kb    | intact       | 51            | 3380502-3427508 | Salmonella phage 118970_sal3          | 51.12% | <a href="#">NC_031940</a> |
|      | 3 | 40.2Kb  | intact       | 49            | 3645014-3685272 | Bacteriophage 186                     | 52.39% | <a href="#">NC_001317</a> |
|      | 4 | 18.4Kb  | incomplete   | 23            | 4810228-4828690 | Enterobacteria phage P1               | 54.96% | <a href="#">NC_005856</a> |
|      | 5 | 79.2Kb  | intact       | 101           | 5331098-5410390 | Klebsiella phage phiKO2               | 50.70% | <a href="#">NC_005857</a> |
| KP2  | 1 | 48.4Kb  | intact       | 59            | 712379-760819   | Cronobacter phage ENT47670            | 51.76% | <a href="#">NC_019927</a> |
|      | 2 | 46.4Kb  | intact       | 73            | 1603259-1649724 | Salmonella phage SEN34                | 53.81% | <a href="#">NC_028699</a> |
|      | 3 | 38.3Kb  | intact       | 38            | 4298937-4337258 | Salmonella phage SEN5                 | 50.06% | <a href="#">NC_028701</a> |
|      | 4 | 82.1Kb  | intact       | 84            | 4457324-4539481 | Enterobacteria phage mEp237           | 52.78% | <a href="#">NC_019704</a> |
|      | 5 | 38.6Kb  | incomplete   | 35            | 5200991-5239607 | Salmonella phage Fels-1               | 51.76% | <a href="#">NC_010391</a> |
|      | 6 | 35.6Kb  | intact       | 44            | 5455142-5490762 | Enterobacteria phage HK140            | 54.27% | <a href="#">NC_019710</a> |
|      | 7 | 23.8Kb  | incomplete   | 16            | 5502376-5526273 | Pseudomonas phage YMC11/07/PS4_PAE_BP | 55.67% | <a href="#">NC_030909</a> |
| KP3  | 1 | 71.5Kb  | intact       | 62            | 1742074-1813596 | Edwardsiella phage GF-2               | 55.56% | <a href="#">NC_026611</a> |
|      | 2 | 27.4Kb  | incomplete   | 17            | 3014842-3042269 | Salmonella phage 118970_sal3          | 54.32% | <a href="#">NC_031940</a> |
|      | 3 | 37.8Kb  | intact       | 40            | 3366089-3403943 | Salmonella phage SEN5                 | 50.42% | <a href="#">NC_028701</a> |
|      | 4 | 48.4Kb  | intact       | 49            | 3530379-3578820 | Acinetobacter phage vB_AbaS_TRS1      | 50.61% | <a href="#">NC_031098</a> |
|      | 5 | 22.6Kb  | intact       | 28            | 4817281-4839974 | Enterobacteria phage HK544            | 51.38% | <a href="#">NC_019767</a> |
| KP4  | 1 | 27.1Kb  | incomplete   | 29            | 102698-129891   | Escherichia phage HK639               | 52.28% | <a href="#">NC_001658</a> |
|      | 2 | 22.7Kb  | intact       | 28            | 1794236-1817032 | Enterobacteria phage P88              | 57.06% | <a href="#">NC_026014</a> |
|      | 3 | 24.1Kb  | intact       | 25            | 4790176-4814373 | Enterobacteria phage P88              | 53.64% | <a href="#">NC_026014</a> |
| KP5  | 1 | 51.1Kb  | intact       | 44            | 869628-920735   | Salmonella phage 118970_sal3          | 52.10% | <a href="#">NC_031940</a> |
|      | 2 | 32Kb    | intact       | 38            | 3321812-3353900 | Bacteriophage 186                     | 53.40% | <a href="#">NC_001317</a> |
|      | 3 | 22.4Kb  | questionable | 20            | 3708615-3731029 | Acinetobacter phage vB_AbaS_TRS1      | 52.27% | <a href="#">NC_031098</a> |
|      | 4 | 36.1Kb  | intact       | 41            | 4458293-4494443 | Salmonella phage SEN5                 | 54.72% | <a href="#">NC_028701</a> |
| KP6  | 1 | 47.8Kb  | intact       | 37            | 965640-1013538  | Salmonella phage 118970_sal3          | 51.97% | <a href="#">NC_031940</a> |
|      | 2 | 32Kb    | intact       | 39            | 3464346-3496434 | Bacteriophage 186                     | 53.40% | <a href="#">NC_001317</a> |
|      | 3 | 33.4Kb  | incomplete   | 27            | 4095088-4128579 | Enterobacteria phage mEp237           | 52.05% | <a href="#">NC_019704</a> |
|      | 4 | 21Kb    | questionable | 20            | 4129167-4150245 | Acinetobacter phage vB_AbaS_TRS1      | 52.80% | <a href="#">NC_031098</a> |
|      | 5 | 36.1Kb  | intact       | 40            | 4720240-4756390 | Salmonella phage SEN5                 | 54.72% | <a href="#">NC_028701</a> |
|      | 6 | 22.1Kb  | incomplete   | 24            | 5284859-5307029 | Cronobacter phage ENT39118            | 55.66% | <a href="#">NC_019934</a> |
| KP7  | 1 | 53.1Kb  | intact       | 53            | 74086-127279    | Enterobacteria phage mEp237           | 52.06% | <a href="#">NC_019704</a> |
|      | 2 | 77.2Kb  | intact       | 76            | 1075415-1152644 | Salmonella phage SEN34                | 52.38% | <a href="#">NC_028699</a> |
|      | 3 | 37.6Kb  | intact       | 45            | 2287591-2325203 | Salmonella phage 118970_sal3          | 52.11% | <a href="#">NC_031940</a> |
|      | 4 | 40Kb    | intact       | 45            | 4306499-4346539 | Salmonella phage 118970_sal3          | 51.36% | <a href="#">NC_031940</a> |
|      | 5 | 38.3Kb  | intact       | 36            | 4746607-4784928 | Salmonella phage SEN4                 | 50.06% | <a href="#">NC_029015</a> |
|      | 6 | 50.1Kb  | intact       | 53            | 5125887-5175991 | Salmonella phage SJ46                 | 51.45% | <a href="#">NC_031129</a> |
|      | 7 | 36.4Kb  | incomplete   | 58            | 5367227-5403722 | Salmonella phage SEN34                | 52.42% | <a href="#">NC_028699</a> |
|      | 8 | 38.3Kb  | intact       | 40            | 42298-80619     | Salmonella phage SEN4                 | 50.06% | <a href="#">NC_029015</a> |
| KP8  | 2 | 53.1Kb  | intact       | 55            | 205236-258429   | Enterobacteria phage mEp237           | 52.06% | <a href="#">NC_019704</a> |
|      | 3 | 77.2Kb  | intact       | 75            | 1206565-1283794 | Salmonella phage SEN34                | 52.38% | <a href="#">NC_028699</a> |
|      | 4 | 40.4Kb  | intact       | 41            | 2762740-2803152 | Salmonella phage 118970_sal3          | 52.17% | <a href="#">NC_031940</a> |
|      | 5 | 44.5Kb  | intact       | 50            | 4436414-4480967 | Salmonella phage 118970_sal3          | 52.04% | <a href="#">NC_031940</a> |
|      | 6 | 16.7Kb  | questionable | 21            | 5119886-5136657 | Staphylococcus phage SPbeta-like      | 51.80% | <a href="#">NC_029119</a> |
|      | 7 | 42.3Kb  | intact       | 48            | 5136658-5178994 | Enterobacteria phage P1               | 50.80% | <a href="#">NC_005856</a> |
|      | 8 | 11.5Kb  | incomplete   | 22            | 5359394-5370913 | Salmonella phage SEN34                | 52.57% | <a href="#">NC_028699</a> |
|      | 9 | 9.1Kb   | incomplete   | 10            | 762750-771903   | Sphingomonas phage PAU                | 52.55% | <a href="#">NC_019521</a> |
| KP9  | 2 | 44.6Kb  | intact       | 45            | 1873891-1918497 | Enterobacteria phage Fels-2           | 52.23% | <a href="#">NC_010463</a> |
|      | 3 | 40.6Kb  | intact       | 43            | 2443769-2484424 | Salmonella phage RE-2010              | 53.48% | <a href="#">NC_019488</a> |
|      | 4 | 44.7Kb  | intact       | 45            | 3764659-3809374 | Enterobacteria phage HK140            | 50.16% | <a href="#">NC_019710</a> |
|      | 1 | 22.7Kb  | intact       | 28            | 2480564-2503279 | Enterobacteria phage P88              | 57.39% | <a href="#">NC_026014</a> |
| KP10 | 2 | 47.8Kb  | intact       | 56            | 2818001-2865810 | Salmonella phage SPN1S                | 54.45% | <a href="#">NC_016761</a> |
|      | 3 | 13.1Kb  | incomplete   | 14            | 3832622-3845783 | Enterobacteria phage P4               | 51.38% | <a href="#">NC_001609</a> |
|      | 4 | 13.7Kb  | questionable | 15            | 5040370-5054090 | Enterobacteria phage P4               | 48.29% | <a href="#">NC_001609</a> |
|      | 5 | 31.1Kb  | intact       | 30            | 5095297-5126468 | Salmonella phage SJ46                 | 51.77% | <a href="#">NC_031129</a> |
|      | 6 | 22.8Kb  | incomplete   | 26            | 5343788-5366648 | Salmonella phage 118970_sal3          | 53.19% | <a href="#">NC_031940</a> |
|      | 7 | 29.4Kb  | questionable | 40            | 5420801-5450260 | Acinetobacter phage vB_AbaS_TRS1      | 52.22% | <a href="#">NC_031098</a> |
|      | 8 | 64.3Kb  | intact       | 60            | 5487736-5552117 | Enterobacteria phage mEpX1            | 51.17% | <a href="#">NC_019709</a> |
|      | 1 | 21.7Kb  | incomplete   | 24            | 2187029-2208797 | Cronobacter phage ENT39118            | 53.60% | <a href="#">NC_019934</a> |
| KP11 | 2 | 30.6Kb  | incomplete   | 37            | 4699164-4729819 | Escherichia phage HK639               | 54.68% | <a href="#">NC_016158</a> |
|      | 3 | 37.5Kb  | intact       | 41            | 4861980-4899526 | Salmonella phage SEN4                 | 50.56% | <a href="#">NC_029015</a> |
|      | 4 | 63.2Kb  | intact       | 68            | 5190949-5254177 | Klebsiella phage phiKO2               | 53.15% | <a href="#">NC_005857</a> |
|      | 5 | 25.2Kb  | incomplete   | 43            | 5362240-5387505 | Escherichia phage HK639               | 53.93% | <a href="#">NC_016158</a> |
|      | 6 | 28.4Kb  | questionable | 33            | 5401383-5429872 | Salmonella phage SEN34                | 53.28% | <a href="#">NC_028699</a> |
|      | 1 | 35.8Kb  | intact       | 43            | 3944827-3980649 | Salmonella phage RE-2010              | 51.46% | <a href="#">NC_019488</a> |
| KP12 | 2 | 127.8Kb | intact       | 108           | 4625026-4752860 | Salmonella phage SSU5                 | 48.68% | <a href="#">NC_018843</a> |
|      | 3 | 6.4Kb   | incomplete   | 6             | 5493198-5499655 | Salmonella phage SJ46                 | 58.73% | <a href="#">NC_031129</a> |
|      | 4 | 8.3Kb   | incomplete   | 15            | 5722930-5731232 | Enterobacteria phage P1               | 53.62% | <a href="#">NC_005856</a> |
|      | 1 | 35.8Kb  | intact       | 44            | 3916783-3952605 | Salmonella phage RE-2010              | 51.46% | <a href="#">NC_019488</a> |
| KP13 | 2 | 118.1Kb | intact       | 109           | 4617822-4736016 | Salmonella phage SSU5                 | 49.79% | <a href="#">NC_018843</a> |
|      | 1 | 40.9Kb  | intact       | 43            | 705153-746065   | Salmonella phage 64795_sal3           | 51.95% | <a href="#">NC_031918</a> |
| KP14 | 1 | 46.6Kb  | intact       | 61            | 2194448-2241101 | Cronobacter phage ENT47670            | 52.93% | <a href="#">NC_019927</a> |
|      | 2 | 35.2Kb  | incomplete   | 24            | 4429646-4464903 | Enterobacteria phage mEp237           | 53.66% | <a href="#">NC_019704</a> |

|      |        |              |              |                 |                                  |                                       |                           |                           |
|------|--------|--------------|--------------|-----------------|----------------------------------|---------------------------------------|---------------------------|---------------------------|
| KP15 | 3      | 121.9Kb      | intact       | 125             | 4774724-4896641                  | Salmonella phage SSU5                 | 49.10%                    | <a href="#">NC_018843</a> |
|      | 4      | 20.8Kb       | incomplete   | 31              | 5183005-5203827                  | Cronobacter phage ENT39118            | 53.67%                    | <a href="#">NC_019934</a> |
|      | 5      | 44.2Kb       | intact       | 53              | 5318971-5363225                  | Acinetobacter phage vB_AbaS_TRS1      | 51.51%                    | <a href="#">NC_031098</a> |
| KP16 | 1      | 55.4Kb       | intact       | 51              | 481459-536858                    | Enterobacteria phage mEp237           | 51.42%                    | <a href="#">NC_019704</a> |
|      | 2      | 52.7Kb       | intact       | 62              | 3253236-3305941                  | Cronobacter phage ENT47670            | 53.11%                    | <a href="#">NC_019927</a> |
|      | 3      | 40.2Kb       | intact       | 49              | 3663702-3703960                  | Bacteriophage 186                     | 52.40%                    | <a href="#">NC_001317</a> |
|      | 4      | 16.8Kb       | incomplete   | 22              | 3962833-3979651                  | Pectobacterium phage ZF40             | 48.86%                    | <a href="#">NC_019522</a> |
|      | 5      | 119.4Kb      | intact       | 117             | 4758652-4878141                  | Salmonella phage SSU5                 | 49.34%                    | <a href="#">NC_018843</a> |
| KP17 | 1      | 35.9Kb       | intact       | 44              | 1038682-1074619                  | Salmonella phage RE-2010              | 51.36%                    | <a href="#">NC_019488</a> |
|      | 2      | 40.1Kb       | intact       | 42              | 3942507-3982673                  | Salmonella phage Fels-1               | 50.93%                    | <a href="#">NC_010391</a> |
| KP18 | 1      | 21.2Kb       | incomplete   | 18              | 1415424-1436698                  | Salmonella phage RE-2010              | 49.70%                    | <a href="#">NC_019488</a> |
|      | 2      | 21.8Kb       | incomplete   | 10              | 1750215-1772106                  | Enterobacteria phage P4               | 55.08%                    | <a href="#">NC_001609</a> |
|      | 3      | 31.4Kb       | intact       | 28              | 3417132-3448580                  | Bacteriophage 186                     | 53.85%                    | <a href="#">NC_001317</a> |
|      | 4      | 33Kb         | questionable | 25              | 3631870-3664923                  | Salmonella phage ST64B                | 52.24%                    | <a href="#">NC_004313</a> |
|      | 5      | 30.8Kb       | incomplete   | 28              | 4507332-4538222                  | Salmonella phage SEN34                | 54.02%                    | <a href="#">NC_028699</a> |
|      | 6      | 30.6Kb       | intact       | 23              | 5048230-5078877                  | Stx2-converting phage 1717            | 56.65%                    | <a href="#">NC_011357</a> |
|      | 7      | 35.4Kb       | questionable | 27              | 5064277-5099726                  | Enterobacteria phage P4               | 54.16%                    | <a href="#">NC_001609</a> |
|      | 8      | 20.4Kb       | incomplete   | 9               | 5153242-5173669                  | Staphylococcus phage SPbeta-like      | 56.00%                    | <a href="#">NC_029119</a> |
|      | 9      | 20.2Kb       | questionable | 23              | 5237237-5257492                  | Enterobacteria phage Fels-2           | 51.34%                    | <a href="#">NC_010463</a> |
|      | 10     | 19.2Kb       | intact       | 24              | 5379811-5399086                  | Salmonella phage RE-2010              | 53.35%                    | <a href="#">NC_019488</a> |
|      | 11     | 42.3Kb       | intact       | 58              | 5439737-5482095                  | Salmonella phage RE-2010              | 54.43%                    | <a href="#">NC_019488</a> |
| KP19 | 1      | 36.2Kb       | intact       | 38              | 249214-285490                    | Enterobacteria phage mEp235           | 50.44%                    | <a href="#">NC_019708</a> |
|      | 2      | 28.5Kb       | intact       | 30              | 4376629-4405226                  | Acinetobacter phage vB_AbaS_TRS1      | 51.98%                    | <a href="#">NC_031098</a> |
|      | 3      | 31.1Kb       | incomplete   | 23              | 4602541-4633696                  | Enterobacteria phage mEp237           | 52.90%                    | <a href="#">NC_019704</a> |
| KP20 | 1      | 35Kb         | questionable | 35              | 1081988-1116990                  | Acinetobacter phage vB_AbaS_TRS1      | 51.39%                    | <a href="#">NC_031098</a> |
|      | 2      | 24Kb         | intact       | 26              | 1509308-1533316                  | Enterobacteria phage P88              | 53.76%                    | <a href="#">NC_026014</a> |
|      | 3      | 10.2Kb       | incomplete   | 11              | 1848616-1858910                  | Salmonella phage RE-2010              | 48.00%                    | <a href="#">NC_019488</a> |
|      | 4      | 50.7Kb       | intact       | 56              | 2299299-2350077                  | Cronobacter phage ENT47670            | 52.78%                    | <a href="#">NC_019927</a> |
|      | 5      | 40.6Kb       | intact       | 49              | 4694637-4735287                  | Salmonella phage RE-2010              | 53.05%                    | <a href="#">NC_019488</a> |
| KP21 | 1      | 49Kb         | intact       | 63              | 305908-354919                    | Salmonella phage vB_SosS_Oslo         | 52.46%                    | <a href="#">NC_018279</a> |
|      | 2      | 52Kb         | intact       | 34              | 3394810-3446894                  | Enterobacteria phage mEp235           | 52.27%                    | <a href="#">NC_019708</a> |
|      | 3      | 59.1Kb       | intact       | 77              | 5047086-5106208                  | Salmonella phage SPN3UB               | 52.26%                    | <a href="#">NC_019545</a> |
|      | 4      | 11.2Kb       | incomplete   | 16              | 5430197-5441396                  | Enterobacteria phage phi92            | 51.38%                    | <a href="#">NC_023693</a> |
| KP22 | 1      | 34.1Kb       | incomplete   | 22              | 490767-524912                    | Pectobacterium phage ZF40             | 52.47%                    | <a href="#">NC_019522</a> |
|      | 2      | 34.5Kb       | intact       | 25              | 1292141-1326660                  | Klebsiella phage phiKO2               | 53.74%                    | <a href="#">NC_005857</a> |
|      | 3      | 48.6Kb       | intact       | 56              | 1918949-1967588                  | Edwardsiella phage GF-2               | 52.13%                    | <a href="#">NC_025611</a> |
|      | 4      | 37.4Kb       | intact       | 45              | 2275380-2312796                  | Enterobacteria phage Fels-2           | 50.62%                    | <a href="#">NC_010463</a> |
|      | 5      | 26.5Kb       | intact       | 31              | 4920636-4947220                  | Enterobacteria phage mEp043 c-1       | 50.37%                    | <a href="#">NC_019706</a> |
|      | 6      | 14.8Kb       | intact       | 13              | 5275095-5289926                  | Stx2-converting phage 1717            | 52.10%                    | <a href="#">NC_011357</a> |
| KP23 | 1      | 34.7Kb       | intact       | 41              | 101013-135760                    | Enterobacteria phage P88              | 53.94%                    | <a href="#">NC_026014</a> |
|      | 2      | 111Kb        | intact       | 105             | 4778689-4889726                  | Salmonella phage SSU5                 | 48.92%                    | <a href="#">NC_018843</a> |
| KP24 | 1      | 23.9Kb       | intact       | 25              | 56462-80410                      | Enterobacteria phage P88              | 53.86%                    | <a href="#">NC_026014</a> |
|      | 2      | 23.2Kb       | questionable | 20              | 229001-252292                    | Acinetobacter phage vB_AbaS_TRS1      | 51.85%                    | <a href="#">NC_031098</a> |
|      | 3      | 23.8Kb       | incomplete   | 14              | 2580143-2603995                  | Enterobacteria phage Sf6              | 49.05%                    | <a href="#">NC_005344</a> |
| KP25 | 1      | 53.3Kb       | intact       | 52              | 1211269-1264591                  | Enterobacteria phage mEp237           | 51.12%                    | <a href="#">NC_019704</a> |
|      | 2      | 7.9Kb        | incomplete   | 8               | 1329989-1337897                  | Klebsiella phage 0507-KN2-1           | 47.38%                    | <a href="#">NC_022343</a> |
|      | 3      | 39.8Kb       | intact       | 48              | 3993961-4033835                  | Salmonella phage RE-2010              | 52.83%                    | <a href="#">NC_019488</a> |
|      | 4      | 35.9Kb       | incomplete   | 24              | 5231415-5267344                  | Enterobacteria phage P1               | 53.93%                    | <a href="#">NC_005856</a> |
|      | 5      | 8.3Kb        | incomplete   | 8               | 5383778-5392150                  | Enterobacteria phage phi92            | 55.15%                    | <a href="#">NC_023693</a> |
| KP26 | 1      | 7Kb          | incomplete   | 10              | 430842-437895                    | Pseudomonas phage PAJU2               | 54.08%                    | <a href="#">NC_011373</a> |
|      | 2      | 52.6Kb       | intact       | 46              | 4330389-4383074                  | Enterobacteriophage mEp213            | 52.07%                    | <a href="#">NC_019720</a> |
|      | 3      | 42.9Kb       | intact       | 41              | 4725111-4768013                  | Enterobacteria phage mEp043 c-1       | 52.76%                    | <a href="#">NC_019706</a> |
|      | 4      | 42.4Kb       | intact       | 34              | 4996998-5039452                  | Klebsiella phage phiKO2               | 52.15%                    | <a href="#">NC_005857</a> |
|      | 5      | 14.2Kb       | incomplete   | 26              | 5294689-5308977                  | Enterobacteria phage P1               | 53.23%                    | <a href="#">NC_005856</a> |
| KP27 | 1      | 23.9Kb       | intact       | 25              | 528724-552628                    | Enterobacteria phage P88              | 53.97%                    | <a href="#">NC_026014</a> |
|      | 2      | 35.8Kb       | intact       | 45              | 4521602-4557468                  | Salmonella phage RE-2010              | 51.47%                    | <a href="#">NC_019488</a> |
|      | 3      | 30.7Kb       | intact       | 33              | 4788378-4819133                  | Microcystis phage MaMV-DC             | 54.62%                    | <a href="#">NC_029002</a> |
|      | 4      | 113.3Kb      | intact       | 115             | 5078918-5192247                  | Salmonella phage SSU5                 | 48.98%                    | <a href="#">NC_018843</a> |
| KP28 | 1      | 74.3Kb       | intact       | 93              | 557032-631391                    | Salmonella phage SEN34                | 53.02%                    | <a href="#">NC_028699</a> |
|      | 2      | 48.4Kb       | intact       | 62              | 2255548-2303988                  | Cronobacter phage ENT47670            | 51.76%                    | <a href="#">NC_019927</a> |
|      | 3      | 38.3Kb       | intact       | 37              | 4312129-4350450                  | Salmonella phage SEN5                 | 50.06%                    | <a href="#">NC_028701</a> |
|      | 4      | 82.8Kb       | intact       | 85              | 4470516-4553348                  | Enterobacteria phage mEp237           | 52.78%                    | <a href="#">NC_019704</a> |
|      | 5      | 29.3Kb       | incomplete   | 29              | 5280341-5309735                  | Salmonella phage Fels-1               | 51.44%                    | <a href="#">NC_010391</a> |
|      | 6      | 48.5Kb       | intact       | 30              | 5511889-5560435                  | Bacteriophage HK022                   | 52.76%                    | <a href="#">NC_002166</a> |
|      | 7      | 35.1Kb       | incomplete   | 15              | 5562568-5597762                  | Pseudomonas phage YMC11/07/PS4_PAE_BP | 55.44%                    | <a href="#">NC_030909</a> |
| KP29 | 1      | 37.6Kb       | intact       | 36              | 4418300-4455922                  | Salmonella phage SEN4                 | 50.28%                    | <a href="#">NC_029015</a> |
|      | 1      | 42.7Kb       | intact       | 54              | 1060592-1103296                  | Salmonella phage RE-2010              | 53.01%                    | <a href="#">NC_019488</a> |
| KP30 | 2      | 58Kb         | questionable | 64              | 4880346-4938413                  | Escherichia phage HK639               | 54.01%                    | <a href="#">NC_016158</a> |
|      | 3      | 14.5Kb       | incomplete   | 20              | 5098179-5112694                  | Enterobacteria phage P4               | 46.47%                    | <a href="#">NC_001609</a> |
|      | 4      | 27.6Kb       | intact       | 39              | 5355690-5383379                  | Enterobacteria phage HK140            | 51.81%                    | <a href="#">NC_019710</a> |
|      | 5      | 14.1Kb       | questionable | 18              | 5484442-5498560                  | Enterobacteria phage HK544            | 52.94%                    | <a href="#">NC_019767</a> |
|      | 6      | 40.3Kb       | intact       | 43              | 5518810-5559206                  | Enterobacteria phage mEp235           | 51.82%                    | <a href="#">NC_019708</a> |
|      | 1      | 46.5Kb       | intact       | 42              | 1970872-2017416                  | Enterobacteria phage Fels-2           | 44.42%                    | <a href="#">NC_010463</a> |
| KP31 | 2      | 26.2Kb       | incomplete   | 25              | 3353187-3379465                  | Phage Gifsy-1                         | 48.64%                    | <a href="#">NC_010392</a> |
|      | 3      | 21.4Kb       | questionable | 21              | 3376552-3398046                  | Escherichia phage HK639               | 52.32%                    | <a href="#">NC_016158</a> |
|      | 4      | 46.6Kb       | intact       | 32              | 3690474-3737131                  | Bacteriophage 186                     | 55.39%                    | <a href="#">NC_001317</a> |
| 5    | 25.5Kb | questionable | 28           | 3930643-3956152 | Acinetobacter phage vB_AbaS_TRS1 | 52.50%                                | <a href="#">NC_031098</a> |                           |

|             |   |         |              |     |                 |                                  |        |                           |
|-------------|---|---------|--------------|-----|-----------------|----------------------------------|--------|---------------------------|
| <b>KP32</b> | 1 | 35.8Kb  | intact       | 44  | 3224300-3260166 | Salmonella phage RE-2010         | 51.47% | <a href="#">NC_019488</a> |
|             | 2 | 37.8Kb  | intact       | 41  | 4183571-4221425 | Salmonella phage SEN5            | 50.42% | <a href="#">NC_028701</a> |
|             | 3 | 121.8Kb | intact       | 123 | 4258793-4380657 | Salmonella phage SSU5            | 49.30% | <a href="#">NC_018843</a> |
| <b>KQ1</b>  | 1 | 49.3Kb  | intact       | 39  | 1059858-1109185 | Enterobacteria phage P88         | 56.14% | <a href="#">NC_026014</a> |
|             | 2 | 80.5Kb  | intact       | 87  | 4325872-4406402 | Klebsiella phage phiKO2          | 51.84% | <a href="#">NC_005857</a> |
|             | 3 | 37.9Kb  | intact       | 43  | 4434046-4472015 | Salmonella phage SEN4            | 50.23% | <a href="#">NC_029015</a> |
|             | 4 | 31.7Kb  | questionable | 12  | 5023154-5054908 | Staphylococcus phage SPbeta-like | 54.74% | <a href="#">NC_029119</a> |
| <b>KQ2</b>  | 1 | 35.4Kb  | intact       | 44  | 1015499-1050964 | Salmonella phage 118970_sal3     | 51.30% | <a href="#">NC_031940</a> |
|             | 2 | 36.7Kb  | intact       | 29  | 1052939-1089686 | Klebsiella phage phiKO2          | 53.85% | <a href="#">NC_005857</a> |
|             | 3 | 49.7Kb  | intact       | 44  | 1222156-1271902 | Enterobacteria phage P88         | 56.18% | <a href="#">NC_026014</a> |
|             | 4 | 20.3Kb  | questionable | 10  | 4611535-4631888 | Staphylococcus phage SPbeta-like | 52.94% | <a href="#">NC_029119</a> |
|             | 5 | 37.9Kb  | intact       | 44  | 5101140-5139126 | Salmonella phage SEN4            | 50.23% | <a href="#">NC_029015</a> |

**Supplementary Table S7. PCR primers used for the amplification of the *wzi* and resistance genes.**

| Target Gene                                    | Primer Name | Sequence 5'-3'                              | Amplicon Size |
|------------------------------------------------|-------------|---------------------------------------------|---------------|
| <i>wzi</i> <sup>1</sup>                        | wzi-F       | GTGCCGCGAGCGCTTCTATCTTGGTATTCC              | 580 bp        |
|                                                | wzi-R       | GAGAGCCACTGGTTCCAGAA[C or T]TT[C or G]ACCGC |               |
| <i>bla</i> <sub>SHV</sub> <sup>2</sup>         | SHV-F       | GGTTATGCGTTATATTCGCC                        | 865 bp        |
|                                                | SHV-R       | TTAGCGTTGCCAGTGCTC                          |               |
| <i>bla</i> <sub>CTX-M</sub> <sup>2</sup>       | CTX-M-F     | ATGTGCAGYACCAGTAARGT                        | 593 bp        |
|                                                | CTX-M-R     | TGGGTRAARTARGTSACCAGA                       |               |
| <i>bla</i> <sub>IMP</sub> <sup>3</sup>         | IMP-F       | GGAATAGAGTGGCTTAATTCTC                      | 624 bp        |
|                                                | IMP-R       | CCAAACCACTACGTTATC                          |               |
| <i>bla</i> <sub>VIM</sub> <sup>4,5</sup>       | VIM-F       | AGTGGTGAGTATCCGACAG                         | 212 bp        |
|                                                | VIM-R       | TCAATCTCCGCGAGAAG                           |               |
| <i>bla</i> <sub>KPC</sub> <sup>6</sup>         | KPC-F       | ATGTCACTGTATCGCCGTC                         | 882 bp        |
|                                                | KPC-R       | TTACTGCCCGTTGACGCC                          |               |
| <i>bla</i> <sub>NDM-1</sub> <sup>6</sup>       | NDM-1-F     | TGCATTGATGCTGAGCGGGTG                       | 621 bp        |
|                                                | NDM-1-R     | ATCACGATCATGCTGGCCTTG                       |               |
| <i>bla</i> <sub>OXA-48-like</sub> <sup>7</sup> | O48-GDM-F   | CCAAGCATTTTTACCCGCATCKACC                   | 389 bp        |
|                                                | O48-GDM-R   | GYTTGACCATACGCTGRCTGCG                      |               |

Supplementary References:

1. Brisse, S. *et al.* *wzi* Gene Sequencing, a Rapid Method for Determination of Capsular Type for *Klebsiella* Strains. *J. Clin. Microbiol.* **51**, 4073–4078 (2013).
2. Elumalai, S., Muthu, G., Selvam, R. E. M. & Ramesh, S. Detection of TEM-, SHV- and CTX-M-type  $\beta$ -lactamase production among clinical isolates of *Salmonella* species. *J. Med. Microbiol.* **63**, 962–967 (2014).
3. Li, B. *et al.* Analysis of Drug Resistance Determinants in *Klebsiella pneumoniae* Isolates from a Tertiary-Care Hospital in Beijing, China. *PLOS ONE* **7**, e42280 (2012).
4. Lixandru, B. E. *et al.* Carbapenemase-Producing *Klebsiella pneumoniae* in Romania: A Six-Month Survey. *PLOS ONE* **10**, e0143214 (2015).
5. Pérez-Pérez, F. J. & Hanson, N. D. Detection of Plasmid-Mediated AmpC  $\beta$ -Lactamase Genes in Clinical Isolates by Using Multiplex PCR. *J. Clin. Microbiol.* **40**, 2153–2162 (2002).
6. Wang, D. *et al.* Characterization of the *bla*<sub>KPC-2</sub> and *bla*<sub>KPC-3</sub> genes and the novel *bla*<sub>KPC-15</sub> gene in *Klebsiella pneumoniae*. *J. Med. Microbiol.* **63**, 981–987 (2014).

7. Voets, G. M., Fluit, A. C., Scharringa, J., Cohen Stuart, J. & Leverstein-van Hall, M. A. A set of multiplex PCRs for genotypic detection of extended-spectrum  $\beta$ -lactamases, carbapenemases, plasmid-mediated AmpC  $\beta$ -lactamases and OXA  $\beta$ -lactamases. *Int. J. Antimicrob. Agents* **37**, 356–359 (2011).
